# Supplementary material
Source: PubMed Central journal article supplement (PMC2922430)
Supplement: NIHMS225109-supplement-Supplementary_Table_1.pdf [file NIHMS225109-supplement-Supplementary_Table_1.pdf]

**Supplementary Table 1: Amplification and sequencing primers for *p16<sup>INK4A</sup>/p14<sup>ARF</sup>* and *p53*; Oligonucleotide primers are shown as paired sense (top) and antisense (bottom). Amplicon size refers to the length in base pairs (bp) of the product derived by PCR.**

| Gene           | Exon | Primer sequence (5'-3')  | Amplicon size (bp) |
|----------------|------|--------------------------|--------------------|
| <i>p14</i>     | 1β   | ctcagagccgttccgagat      | 528                |
|                |      | tagcctgggctagagacgaa     |                    |
| <i>p16</i>     | 1α   | ACCGGAGGAAGAAAGAGGAG     | 356                |
|                |      | agaatcgaagcgctacctga     |                    |
| <i>p14/p16</i> | 2    | gtgagggggcttacacaag      | 470                |
|                |      | gggctgaactttctgtgctg     |                    |
| <i>p14/p16</i> | 3    | tacatgcacgtgaagccatt     | 339                |
|                |      | CATTTACGGTAGTGGGGGAA     |                    |
| <i>p53</i>     | 2    | cagccattctttctgctc       | 400                |
|                |      | ccctgtccttaccagaacg      |                    |
| <i>p53</i>     | 3    | tgagtggatccattggaagg     | 280                |
|                |      | tcaaatcatccattgcttg      |                    |
| <i>p53</i>     | 4    | ttctgaaaacaacgttctgg     | 577                |
|                |      | caactttgggacaggagtcag    |                    |
| <i>p53</i>     | 5a   | cactctcaaagaggccaagg     | 495                |
|                |      | ATCAACCCACAGCTGCACA      |                    |
| <i>p53</i>     | 5b   | CACTTGTGCCCTGACTTTCA     | 359                |
|                |      | acacgcaaatttcctccac      |                    |
| <i>p53</i>     | 6    | tggccatctacaagcagtc      | 402                |
|                |      | ttgcacatctcatggggtta     |                    |
| <i>p53</i>     | 7    | gagaatggcgtgaacctg       | 400                |
|                |      | aggtgatgggtagtagtatgg    |                    |
| <i>p53</i>     | 8    | tttctggcttgggacct        | 450                |
|                |      | cttcttggctgggagag        |                    |
| <i>p53</i>     | 9a   | gggagcactaagcgaggt       | 300                |
|                |      | atcactgccccctgatgg       |                    |
| <i>p53</i>     | 9b   | tgccgttttcttctgactg      | 334                |
|                |      | gcaggctaggctaagctatga    |                    |
| <i>p53</i>     | 10   | gctgtataggtacttgaagtgcag | 439                |
|                |      | cactgaggcaagaatgtggtt    |                    |
| <i>p53</i>     | 11   | gtgtggccaccatcttgatt     | 401                |
|                |      | CCACAACAAAACACCAGTGC     |                    |
